# Supplementary material for: Single step aerosol assisted chemical vapor deposition of p–n Sn(ii) oxide–Ti(iv) oxide nanocomposite thin film electrodes for investigation of photoelectrochemical properties
Source: Royal Society of Chemistry journal article supplement (doi:10.1039/c7nj04606e), 2018-01-01
Supplement: c7nj04606e1.pdf [file c7nj04606e1.pdf]

### Electronic Supplementary Materials

## Single step aerosol assisted chemical vapor deposition of p-n Sn(II)oxide-Ti(IV)oxide nanocomposite thin film electrodes for investigation of photoelectrochemical properties

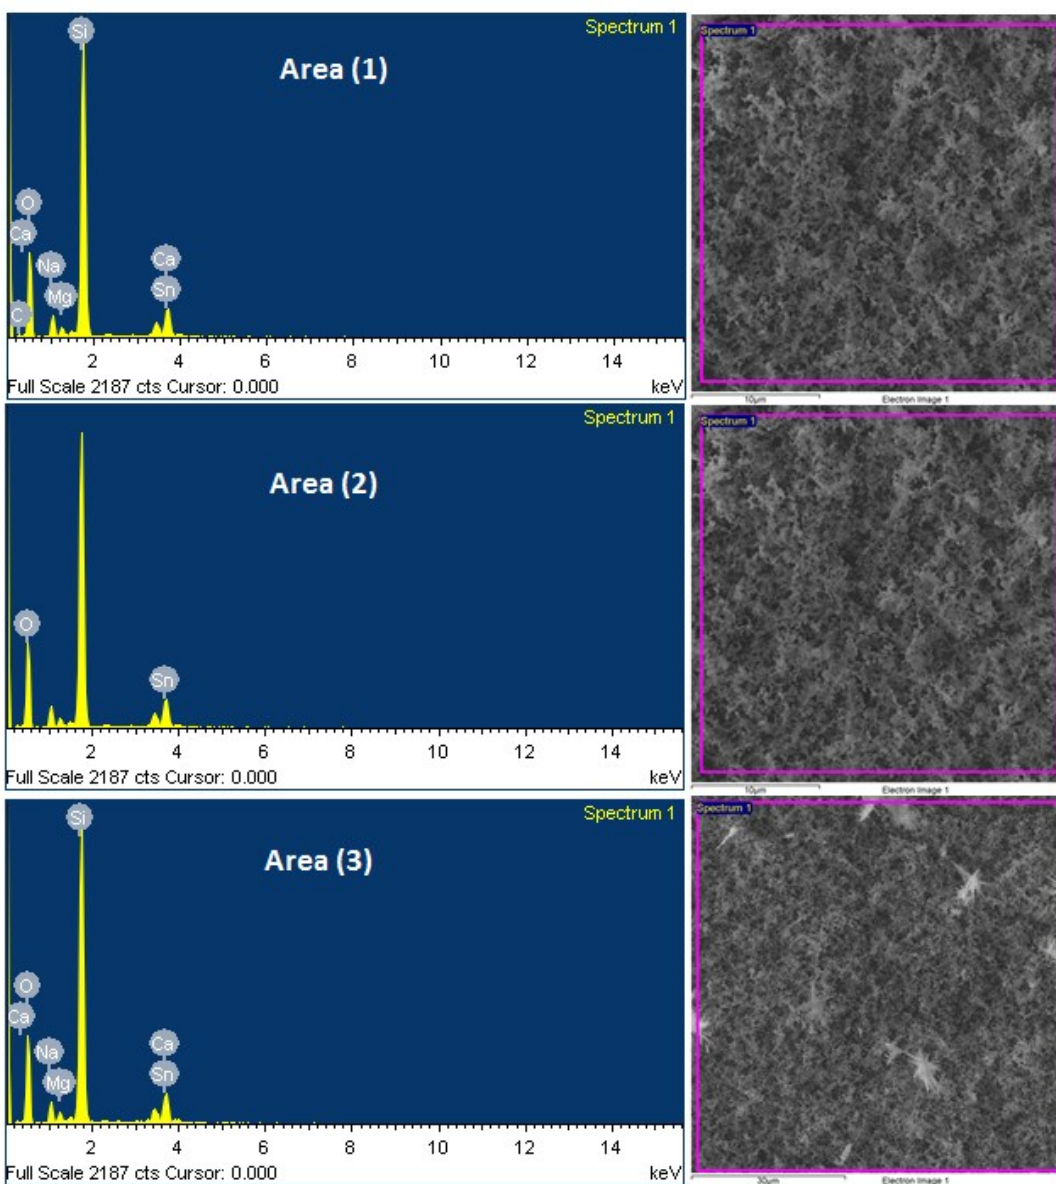

**SI Fig. 1a:** EDX spectra recorded from different areas of pristine SnO film deposited on plain glass substrate at 450 °C.

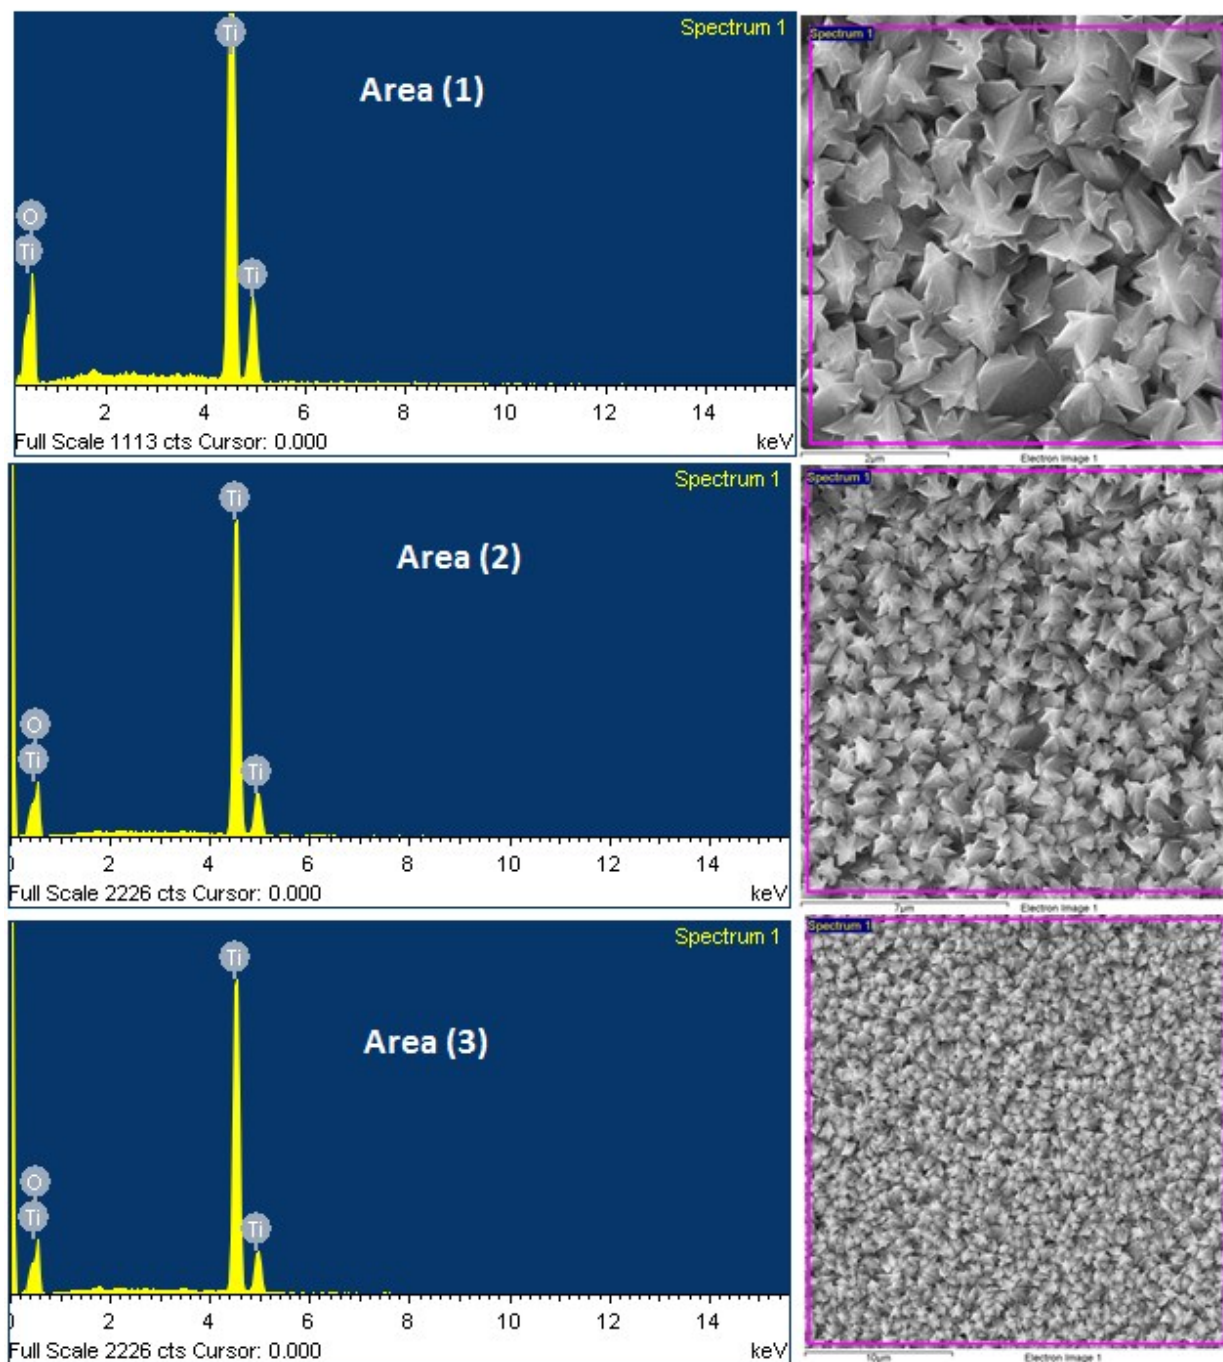

**SI Fig. 1b:** EDX spectra recorded from different areas of pristine TiO<sub>2</sub> film deposited on plain glass substrate at 450 °C.

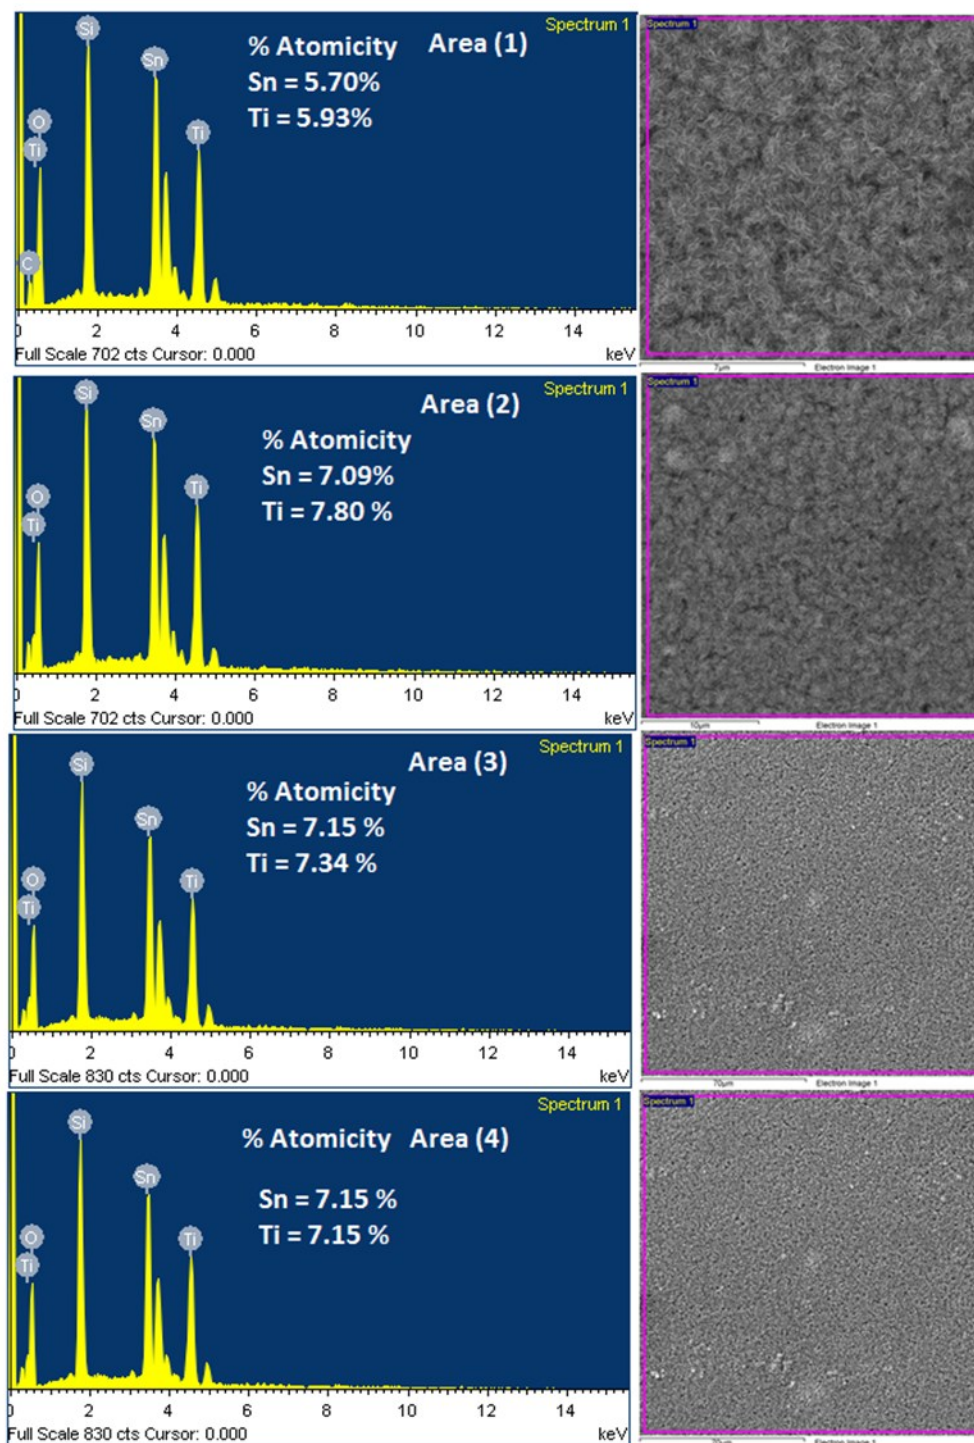

**SI Fig. 1c:** EDX spectra recorded from different areas of SnO-TiO<sub>2</sub> film deposited on plain glass substrate at 450 °C.

**SI Table 1:** Photoelectrochemical performance of Sn–Ti–O based anode nanomaterials.

| Sn-Ti oxide photo catalyst                                         | Max. Photocurrent density (mAcm <sup>-2</sup> ) | Potential range (V) | References   |
|--------------------------------------------------------------------|-------------------------------------------------|---------------------|--------------|
| TiO <sub>2</sub> /SnO <sub>2</sub> hierarchical branched nanowires | 0.068                                           | -1.0 to +1.0        | <sup>1</sup> |
| TiO <sub>2</sub> /SnO <sub>2</sub> nanotubes                       | 0.7                                             | -1.0 to +1.0        | <sup>2</sup> |
| Sn- doped TiO <sub>2</sub>                                         | 1.85                                            | -1.0 to + 0.4       | <sup>3</sup> |
| SnO <sub>2</sub> –TiO <sub>2</sub> nanotube                        | 0.0754                                          | -1.0 to +1.0        | <sup>4</sup> |
| SnO-TiO <sub>2</sub>                                               | 4.3                                             | -0.4 to +0.7        | Current work |

<sup>1</sup> C. Cheng, W. Ren, H. Zhang, Nano Energy 2014, **5**, 132–138

<sup>2</sup> M. Radecka, A. Wnuk, A. Tenczek-Zajac, K. Schneider, K. Zakrzewska, Int. J. Hydrogen Energy, 2015, **40**, 841-851.

<sup>3</sup> M. Xu, P. Da, H. Wu, D. Zhao and G. Zheng, Nano Letters, 2012, **12**, 1503-1508.

<sup>4</sup> J. Hu, Q. Liu, H. Zhang, C-D Chen, Y. Liang, R-G Du, C-J Lin, J. Mater. Chem. A 2015, **45**, 22605-22613.
